1 **Electroactive biofilms on surface functionalized anodes: the**  
2 **anode respiring behavior of a novel electroactive bacterium,**  
3 ***Desulfuromonas acetexigens***

4  
5 **Krishna P. Katuri<sup>a,b</sup>, Sirisha Kamireddy<sup>a,b</sup>, Paul Kavanagh<sup>a†</sup>, Ali Mohammad<sup>b</sup>, Peter Ó**  
6 **Conghaile<sup>a</sup>, Amit Kumar<sup>a</sup>, Pascal E. Saikaly<sup>b\*</sup> and Dónal Leech<sup>a\*</sup>**

7  
8 <sup>a</sup>School of Chemistry & Ryan Institute, National University of Ireland Galway, University Road,  
9 Galway, H91 TK33, Ireland.

10 <sup>b</sup>Biological and Environmental Sciences and Engineering Division, Water Desalination and Reuse  
11 Center, King Abdullah University of Science and Technology, Thuwal 23955-6900, Saudi  
12 Arabia.

13 <sup>†</sup>Present address: School of Chemistry and Chemical Engineering, Queen's University Belfast,  
14 Stranmillis Road, Belfast, BT9 5AG, UK.

15  
16 \*Corresponding authors: [donal.leech@nuigalway.ie](mailto:donal.leech@nuigalway.ie) and [pascal.saikaly@kaust.edu.sa](mailto:pascal.saikaly@kaust.edu.sa)  
17  
18  
19  
20  
21  
22  
23  
24  
25  
26  
27  
28  
29

30

31 **Highlights**

- 32 • Anode surface chemistry affects the early stage biofilm formation.
- 33 • Hydrophilic anode surfaces promote rapid start-up of current generation.
- 34 • Certain functionalized anode surfaces enriched the *Desulfuromonas acetexigens*.
- 35 • *D. acetexigens* is a novel electroactive bacteria.
- 36 • *D. acetexigens* biofilms can produce high current density in a short period of potential  
37 induced growth
- 38 • *D. acetexigens* has the ability to maximize the H<sub>2</sub> recovery in MEC.

39

40

41

42

43

44

45

46

47

48

49

50

51

52

53

54

55

## 56 **Abstract**

57 Surface chemistry is known to influence the formation, composition and electroactivity of  
58 electron-conducting biofilms with however limited information on the variation of microbial  
59 composition and electrochemical response during biofilm development to date. Here we present  
60 voltammetric, microscopic and microbial community analysis of biofilms formed under fixed  
61 applied potential for modified graphite electrodes during early (90 h) and mature (340 h) growth  
62 phases. Electrodes modified to introduce hydrophilic groups (-NH<sub>2</sub>, -COOH and -OH) enhance  
63 early-stage biofilm formation compared to unmodified or electrodes modified with hydrophobic  
64 groups (-C<sub>2</sub>H<sub>5</sub>). In addition, early-stage films formed on hydrophilic electrodes were dominated  
65 by the gram-negative sulfur-reducing bacterium *Desulfuromonas acetexigens* while *Geobacter* sp.  
66 dominated on -C<sub>2</sub>H<sub>5</sub> and unmodified electrodes. As biofilms mature, current generation becomes  
67 similar, and *D. acetexigens* dominates in all biofilms irrespective of surface chemistry.  
68 Electrochemistry of pure culture *D. acetexigens* biofilms reveal that this microbe is capable of  
69 forming electroactive biofilms producing considerable current density of > 9 A/m<sup>2</sup> in a short  
70 period of potential induced growth (~19 h followed by inoculation) using acetate as an electron  
71 donor. The inability of *D. acetexigens* biofilms to use H<sub>2</sub> as a sole source electron donor for  
72 current generation shows promise for maximizing H<sub>2</sub> recovery in single-chambered microbial  
73 electrolysis cell systems treating wastewaters.

74

75 **Keywords:** Microbial electrolysis cell, Extracellular electron transfer, Functionalized anode,  
76 Biofilm anode, *Desulfuromonas acetexigens*, Hydrogen

77

78

79

80

## 81 **1. Introduction**

82 Microbial electrochemical technologies (METs) are electrochemical devices which utilize  
83 microbial biofilms formed at a polarized electrode (anode and/or cathode) to drive  
84 electrochemical reaction(s) (Rittmann, 2018). An electrochemical potential established at the  
85 anode can induce the formation of thick, electron-conducting biofilms composed of special  
86 microbial communities known as electroactive bacteria (Schröder et al., 2015). Such biofilms,  
87 predominately composed of anaerobic microbes, respire by utilizing an electrode as a terminal  
88 electron acceptor in place of natural oxidants such as iron oxide. Potential electroactive bacteria  
89 can be found in diverse environments, ranging from the stratosphere (Zhang et al., 2012) to deep  
90 Red Sea brine pools/marine sediments (Shehab et al., 2017), including sewage (Patil et al., 2010),  
91 sludge, composts, soil, manure, sediments, rumen and agro-industrial wastes (Koch and Harnisch,  
92 2016). Recent study experimentally proved that different known and/or novel electroactive  
93 bacteria thrive geographically in a wide range of ecosystems (marshes, lake sediments, saline  
94 microbial mats, anaerobic soils, etc.) (Miceli et al., 2012). Thus identifying operational  
95 parameters to explore novel electroactive bacteria from mixed culture inoculums with useful  
96 metabolic capacities useful for advancing the MET research for niche specific applications. For  
97 example, the application of METs has been demonstrated in recovery of bioenergy (bioelectricity  
98 and H<sub>2</sub>) from wastewaters (Katuri et al., 2019; Katuri et al., 2018), anoxic NH<sub>4</sub> removal (Shaw et  
99 al., 2019; Vilajeliu-Pons et al., 2018), water reclamation through integration of METs with  
100 membrane filtration processes (Katuri et al., 2018; Katuri et al., 2014; Ma et al., 2015; Malaeb et  
101 al., 2013), etc. In order to further develop this technology it is imperative to maximize the  
102 interaction and to enable efficient electron transfer between the electroactive communities and the  
103 electrodes. Understanding the physiology of anodic electroactive bacteria, tuning electrode  
104 properties to affect the composition of electroactive bacteria, and tethering and structuring of

105 electroactive communities from different sources at electrodes continues to be a challenge and is  
106 the subject of research for the advancement of MES technology.

107 Several approaches have been developed to establish and improve electrochemical  
108 communication between the electroactive bacteria and the anode including chemical treatment of  
109 anodes (Dumitru and Scott, 2016), and modification of anode surfaces with mediators (Dumitru  
110 and Scott, 2016; Park et al., 2000) and with chemical/functional groups (Artyushkova et al., 2015;  
111 Cornejo et al., 2015; Dumitru and Scott, 2016; Guo et al., 2013; Kumar et al., 2013;  
112 Lapinsonnière et al., 2013; Picot et al., 2011; Saito et al., 2011; Santoro et al., 2015; Scott et al.,  
113 2007). Studies show that the chemical and physical properties of the groups introduced at  
114 electrodes can promote or impede electroactive biofilm formation and activity compared to  
115 unmodified electrodes, depending on the surface chemistry employed. In general, electrodes  
116 modified with charged, hydrophilic functional groups enhanced biofilm attachment, decreased  
117 start-up times and improved microbial fuel cell (MFC) or microbial electrolysis cell (MEC)  
118 performance (Guo et al., 2013; Kumar et al., 2013; Picot et al., 2011; Saito et al., 2011), whilst the  
119 presence of non-polar, hydrophobic groups proved detrimental to biofilm formation and current  
120 generation (Guo et al., 2013; Picot et al., 2011).

121 Most studies on the effect of electrode modification on biofilms focus on current generation at an  
122 electrode and on power production in MFC assemblies. Few studies to date investigate the effect  
123 of electrode modification on biofilm microbial composition. It has been established that electrode  
124 modification can influence microbial composition within biofilms at anodes (Guo et al., 2013;  
125 Picot et al., 2011; Santoro et al., 2015). For example, Picot et al., report that biofilms  
126 predominately composed of bacteria from *Geobacter* sp., develop on positively charged  
127 electrodes (Picot et al., 2011), whereas low cell attachment and *Geobacter* sp. proportion is  
128 observed on negatively charged electrodes, with a mixed community evident on neutral  
129 electrodes. Guo et al., found abundance of two *Geobacter* sp. (highly similar to *G. psychrophilus*

130 and *G. sulfurreducens*) in matured biofilms (53 day aged) developed on a range of functionalized  
131 anode surfaces (Guo et al., 2013). The *Geobacter* relative abundance was found to be higher on  
132 anodes functionalized with  $-\text{N}(\text{CH}_3)_3^+$ ,  $-\text{SO}_3^-$  and  $-\text{OH}$  terminal groups compared to those  
133 functionalized with  $-\text{CH}_3$ . In addition, a higher relative abundance of *G. psychrophilus* to *G.*  
134 *sulfurreducens* was found in all biofilms, revealing that surface chemistry supported the  
135 dominance of electroactive bacteria other than *G. sulfurreducens* (the electroactive bacterium  
136 expected to be dominant in anodic biofilms during acetate-fed conditions). However, it should be  
137 noted that the inoculum consisted of effluent from the anodic chamber of an existing acetate-fed  
138 microbial electrochemical reactor which may be enriched in *Geobacter* species. Using a non-  
139 enriched inoculum, Santoro et al., report development of a more diverse consortia consisting of  
140 various classes of *Clostridia* and *Proteobacteria* species on functionalized gold electrodes after  
141 45 days (Santoro et al., 2015).

142 Although such studies provide important insights into the influence of electrode functionalization  
143 on microbial community composition, they have been limited to community analysis of consortia  
144 in thick biofilms, at the end of relatively long growth periods. Information related to the effect of  
145 surface chemistry on the early-stage of microbial biofilm formation, its electromicrobiology and  
146 adaptability, is lacking. Here we examine the microbial community composition at modified  
147 electrodes ( $-\text{NH}_2$ ,  $-\text{COOH}$ ,  $-\text{OH}$  and  $-\text{C}_2\text{H}_5$  terminal groups) for both early (after 90 h growth) and  
148 mature (multilayered biofilm after 340 h growth) stage using a non-enriched inoculum, providing  
149 insight into biofilm adaptability and maturation. We show that microbial communities can change  
150 significantly over time. In addition we present electrochemical characterization of a pure culture  
151 of *Desulfuromonas acetexigens*, a gram negative bacterium which was found to dominate in the  
152 mature mixed culture biofilms developed at the electrodes using this inoculum.

153

154

155

156

## 157 **2. Materials and Methods**

### 158 **2.1. Electrode preparation**

159 Custom built graphite rod electrodes (0.3 cm diameter, Goodfellow, UK) were prepared by  
160 shrouding rod lengths extending out of glass tubes using heat-shrink plastic tubing (Alphawire,  
161 UK) and establishing an electrical connection at the rear with a 0.3 cm diameter copper rod  
162 (Farnell electronics, Ireland) and silver epoxy adhesive (Radionics, Ireland). The final exposed  
163 geometric surface area of the electrode was 3.8 cm<sup>2</sup>. Prior to use these electrodes were sterilized  
164 by placement in boiling water for 15 min, and washed several times with distilled water.

165 Surface functionalization of electrodes to produce -NH<sub>2</sub>, -COOH, -OH and -C<sub>2</sub>H<sub>5</sub> terminal groups  
166 was achieved by electrochemical reduction of the diazonium cation generated *in situ* from the  
167 arylamine using either p-phenylenediamine, 3-(4-aminophenyl)propionic acid, 4-aminobenzyl  
168 alcohol or 4-ethylaniline, respectively. Briefly, 8 mM of NaNO<sub>2</sub> was added into a 10 mM acidic  
169 solution (0.5 M HCl) of the appropriate arylamine to generate the diazonium cation, followed by  
170 electrochemical reduction of the generated aryldiazonium salt by scanning from 0.4 V to -0.4 V  
171 vs Ag/AgCl at 20 mV/s for four cycles as described previously (Boland et al., 2008). The  
172 resulting modified electrodes were removed and rinsed with large volumes of distilled water,  
173 followed by ultrasonication for 1 min to remove any loosely bound species.

### 174 **2.2. Mixed-culture biofilm formation and analysis**

175 The growth medium for forming mixed-culture biofilms was based on *G. sulfurreducens* medium  
176 (<http://www.dsmz.de>, medium no. 826) lacking sodium fumarate and containing 10 mM acetate  
177 as electron donor. The medium was purged with N<sub>2</sub>:CO<sub>2</sub> (80:20) gas mix for 60 min at 10  
178 mL/min gas-flow rate to prepare an oxygen-free solution and then subjected to autoclaving (121

179 °C, 15 min). After autoclaving, bottles were transferred into an anaerobic glove box (Coy  
180 Laboratory, USA) to maintain an anaerobic environment for the medium.

181 Mixed-culture biofilms were formed by placing electrodes in a custom-built glass electrochemical  
182 reactor and application of constant potential (-0.1 V vs Ag/AgCl) using a multi-channel  
183 potentiostat (CH Instruments, USA), a common platinum gauze (5 cm × 6 cm) counter electrode  
184 and Ag/AgCl reference electrode (3.5 M KCl, BioAnalytical Systems, USA), in the presence of  
185 growth medium (500 ml) containing 10 mM acetate as electron donor and 10% of re-suspended  
186 granular anaerobic sludge sampled from an internal circulation digester (Carbery Milk Products  
187 Ltd., Cork, Ireland) as a mixed-culture inoculum. Prior to inoculation the sludge was crushed and  
188 graded by sieving ( $\emptyset < 0.4$  mm) and subsequently concentrated (centrifuge 7000 g, 10 min at 20  
189 °C), washed and re-suspended in 100 ml of sterile de-gassed growth medium. Fresh acetate  
190 electron donor, to provide 10 mM concentration, was added to the reactor after 45 h operation.  
191 After 90 h, at the end of the batch-feed operation, the reactor was completely drained and  
192 electrode samples taken for analysis. The reactor was then filled with fresh growth medium  
193 containing 10 mM acetate, with no additional inoculum, and the reactor conditions switched to  
194 continuous-mode by pumping culture medium containing 10 mM acetate. Culture medium was  
195 maintained in sterile and anaerobic conditions in a reservoir with a working volume of 1 L. The  
196 reservoir was equipped with several ports for continuous purging with N<sub>2</sub>, for pumping culture  
197 medium into the reactor and for sampling culture medium. Sterile 0.2 mm gas filters were placed  
198 on all gas and liquid handling ports except that for pumping the medium from reservoir to reactor.  
199 All inoculations were carried out in a sterile anaerobic glove box (Coy Laboratory, USA), and all  
200 incubations were performed at 30 °C in a controlled temperature room.

201 Electrodes sampled after the batch-feed period (90 h growth) were transferred to separate 15 ml  
202 vials containing 3 ml of sterile extraction solution (phosphate buffer, pH 7.0, 50 mM). Following  
203 biofilm extraction through vigorous vortex, 2 ml of the solution was transferred separately to



204 individual vials for molecular microbial ecology and cell counts analysis. The remainder of the  
205 solution (i.e., 1 ml) was filtered through 0.2  $\mu\text{m}$  sterile filter to obtain a cell-free solution for  
206 screening of the presence of soluble mediators in the biofilm matrix using CV analysis. A  
207 miniature custom-built three-electrode electrochemical cell used to conduct voltammetry in the  
208 small-volume electrolyte using a graphite disc (6 mm diameter) and platinum wire as working and  
209 counter electrodes, respectively.

210 In addition, 0.5 cm length of each electrode was sampled and fixed in 2% glutaraldehyde solution  
211 for subsequent microscopy analysis. The remaining length of each electrode was transferred to a  
212 new electrochemical cell containing fresh growth medium, but with no acetate as electron donor,  
213 in order to perform non-turnover voltammetry. A similar sample analysis protocol was adopted  
214 for electrodes collected at the end of the continuous-feed growth period (at 340 h).

### 215 **2.3. *D. acetexigens* biofilm formation and analysis**

216 The *D. acetexigens* strain DSM 1397 was cultured at 30 °C in 50 mL air tight, rubber septa-  
217 sealed, anaerobic syringe bottles containing 45 mL of growth medium (DSM 148) and  
218 subsequently sub-cultured three times (each batch incubated for 3 days) in fumarate-containing  
219 growth medium prior to inoculation in the electrochemical cell. The cell pellet collected through  
220 centrifugation (at 8000x for 5 min) was used as an inoculum (10% w/v; cell density  $3.2 \times 10^8$   
221 cells/ml) for the tests.

222 *D. acetexigens* biofilms were developed on graphite rod ( $\sim 4.8 \text{ cm}^2$ ) electrodes by application of  
223 constant potential (-0.1 V vs Ag/AgCl) in a three-electrode electrochemical cell configuration  
224 using *D. acetoexigens* growth medium (lacking fumarate, resazurin and  $\text{Na}_2\text{S}$ ) as electrolyte with  
225 10 mM sodium acetate as electron donor. Four reactors were operated in parallel in fed-batch  
226 mode under the same operational conditions. All inoculations/batch changes were carried out in a  
227 sterile anaerobic glove box (Labconco, USA) and incubations were performed at 30 °C in a  
228 controlled-temperature room.

229 The interaction and growth of *D. acetexigens* cells on functionalized (-NH<sub>2</sub>, -COOH, -OH and -  
230 C<sub>2</sub>H<sub>5</sub>) anodes during early-stage of growth was studied by placing electrodes in a custom-built  
231 glass electrochemical reactor and application of constant potential (-0.1 V vs Ag/AgCl) using a  
232 multi-channel potentiostat (CH Instruments, USA), a common platinum gauze (5 cm × 6 cm)  
233 counter electrode and Ag/AgCl reference electrode (3.5 M KCl, BioAnalytical Systems, USA), in  
234 the presence of *D. acetexigens* growth medium (lacking fumarate, resazurin and Na<sub>2</sub>S) containing  
235 10 mM acetate as an electron donor and 10% w/v inoculum (2.9 × 10<sup>8</sup> cells/ml), with growth  
236 terminated at 25 h after inoculation to measure biomass density on the electrodes.

237

### 238 **3. Results**

#### 239 **3.1. Electrode modification**

240 Graphite electrodes were modified through *in situ* formation and subsequent electroreduction of  
241 aryldiazonium salts from arylamines as previously described (Boland et al., 2008). Selection of  
242 arylamines containing terminal -NH<sub>2</sub>, -COOH, -OH and -C<sub>2</sub>H<sub>5</sub> functional groups results in  
243 formation of surfaces presenting such groups. Voltammograms for the aryldiazonium salt  
244 electroreduction process are presented in [Fig. S1](#) showing reduction currents for the salts at -0.13  
245 V for -NH<sub>2</sub>, +0.17 V for -COOH, -0.08 V for -OH, and +0.02 V for -C<sub>2</sub>H<sub>5</sub> electrodes (V vs  
246 Ag/AgCl). The decrease in reduction peak current on the second voltammetric scan is indicative  
247 of coupled layer formation (Boland et al., 2008). Zeta potential and contact angle for these  
248 electrodes, measured in growth media, are presented in [Table S1](#). Electrodes functionalized to  
249 introduce -NH<sub>2</sub>, -COOH and -OH groups display surface zeta potential values that are similar,  
250 with the unmodified and -C<sub>2</sub>H<sub>5</sub> functionalized electrodes showing more negative zeta potentials,  
251 in the growth medium. Similarly the unmodified and -C<sub>2</sub>H<sub>5</sub> functionalized electrodes have the  
252 highest contact angles, indicative of surfaces of more hydrophobic character compared to the  
253 surfaces functionalized to introduce groups capable of hydrogen-bonding, such as the -NH<sub>2</sub>, -

254 COOH and -OH groups. The cell mats prepared using biofilms of *G. sulfurreducens* or *D.*  
255 *acetexigens* display a relatively low negative zeta potential and low contact angles, indicating  
256 material that is hydrophilic and relatively easily wetted.

### 257 **3.2. Electrochemical characterization of biofilms**

258 Induction of growth of electroactive bacteria, and bacterial biofilms, on the electrode surfaces was  
259 implemented by polarization of all electrodes (in duplicate) at -0.1 V vs. Ag/AgCl in a three-  
260 electrode electrochemical cell configuration using an anaerobic sludge mixed culture inoculum  
261 and acetate as carbon and energy source. Initial start-up of bacterial biofilm growth was  
262 undertaken in a batch reactor configuration, with removal of inoculum and replenishment of  
263 acetate feed at 45 h, when the current started to fall following a period of growth (Fig. 1A). In  
264 contrast to other studies (Lapinsonnière et al., 2013) electrode modification did not appear to  
265 dramatically affect the time taken for current generation to occur. Onset of a rapid growth in  
266 current, for all electrodes, commences between 60-65 h after initial inoculation, which is 20-25 h  
267 after removal of inoculum and introduction of fresh acetate as feed in the batch-mode  
268 configuration. However, consistent with earlier studies (Cornejo et al., 2015; Guo et al., 2013;  
269 Kumar et al., 2013; Santoro et al., 2015), the magnitude of the maximum current density during  
270 this early batch-feed cycle is influenced by surface chemistry. Anode surfaces functionalized with  
271 chemical functional groups capable of hydrogen-bonding, and therefore more hydrophilic (-NH<sub>2</sub>,  
272 -COOH and -OH), yield higher currents compared to the unmodified and -C<sub>2</sub>H<sub>5</sub> functionalized  
273 surfaces (Fig. 1B). Following this initial period (90 h) of electrochemically-induced growth in a  
274 batch-fed system a set of electrodes was removed for cyclic voltammetric (CV), microscopic and  
275 sequencing analysis. The other set of electrodes was placed in the reactor and continuous flow of  
276 acetate-containing cell culture medium commenced at a flow rate of 1 L/day followed by  
277 switching to 0.5 L/day after approximately 40 h of continuous feed operation (Fig. 1C, black  
278 arrow). During 1 L/day continuous-feed operation all electrodes produced similar current profiles,

279 with the exception of the  $-C_2H_5$  functionalized electrode, which produced significantly lower  
280 current. Decreasing the flow rate of acetate feed to 0.5 L/day (at ~135 h after initial inoculation of  
281 the electrodes, see Fig. 1C) resulted in lower magnitude of current output for all electrodes,  
282 except for the  $-C_2H_5$  functionalized electrode, which produced now a similar current to that  
283 produced by all other electrodes. The decrease in current as a function of flow rate in this study is  
284 indicative of acetate mass transport controlled current production. Continuous-feed was  
285 maintained up to 340 h after inoculation (Fig. S2), with similar current profiles observed for  
286 biofilms developed on all electrodes regardless of flow rate or interruption. Interruption of current  
287 generation was implemented to enable recording of CV at several intervals during the continuous-  
288 feed period, with these CVs compared to CVs for early-stage biofilms taken at the end of the  
289 batch-feed period (90 h).

290 The slow-scan CV response of the early stage biofilms (90 h after initial inoculation) when  
291 recorded under substrate-limited conditions all display a well-defined redox couple centered at ~ -  
292 0.43 V and an oxidation peak at ~ -0.12 V vs Ag/AgCl, as exemplified by the response obtained  
293 at the electrode functionalized to introduce -OH terminal groups (Fig. 2A). The non-turnover  
294 analysis of these early-stage biofilms, by transfer into growth medium lacking acetate as electron  
295 donor, show three redox responses centered at ~ -0.53 V, -0.36 V and -0.28 V vs Ag/AgCl, shown  
296 for the electrode functionalized to introduce -OH terminal groups (Fig. 2A). The CV analysis of  
297 the filtered medium harvested from the reactor after 90 h shows a redox couple, with an oxidation  
298 peak at ~ -0.13 V (Fig. S3) that is similar to the oxidation peak (~ -0.12 V) observed for the CVs  
299 recorded in the growth medium under substrate-limited conditions and to one of the oxidation  
300 peaks observed under non-turnover conditions. The slow scan CVs recorded in the presence of 10  
301 mM acetate as electron donor in the electrochemical cell, when flow was halted, show typical  
302 sigmoidal shape expected for electrocatalytic oxidation of acetate (Fricke et al., 2008; Katuri et  
303 al., 2010; Marsili et al., 2008), as shown for the electrode functionalized to introduce -OH

304 terminal groups (Fig. 2B). There is an increase in the catalytic oxidation current as a function of  
305 time after inoculation, despite evidence of uncompensated resistance effect in the CV responses.  
306 The sigmoidal shaped CV obtained at 250 h after inoculation (Fig. 2B), when fit to a simple  
307 model for steady-state voltammetry (Jana et al., 2014), indicates that electron transfer is  
308 dominated by a redox species with an estimated half-wave potential of -0.45 V vs Ag/AgCl, once  
309 the approximately 60  $\Omega$  uncompensated resistance is accounted for by correcting at each applied  
310 potential to achieve the best fit between model and recorded CV. As noted previously (Jana et al.,  
311 2014; Torres et al., 2010), this uncompensated resistance is because of cell configuration  
312 (distance between working and reference electrode, conductivity of medium, etc.) and probably  
313 not a function of low electronic conductivity within the biofilm (Dhar et al., 2017). The half-wave  
314 potential of the catalytic CV response, -0.45 V vs Ag/AgCl, correlates well with the potential for  
315 the redox couple observed under substrate-limited conditions and the major redox peak under  
316 non-turnover conditions (Fig. 2A), while the current density of  $\sim 4 \text{ A/m}^2$  is of the same order of  
317 magnitude as that observed for multi-layered films of electroactive bacteria on anodes (Jana et al.,  
318 2014; Katuri et al., 2012; Marsili et al., 2008).

### 319 **2.3. Microscopy**

320 The SEM images captured at electrodes after early-stage growth (90 h) compared to those  
321 captured at a later stage (340 h after initial inoculation) provide additional evidence that the  
322 observed amperometric and CV current generation is associated with formation and growth of  
323 electrode-attached biofilms. The SEMs after early-stage growth show sparsely and irregularly  
324 distributed bacterial cells along with some cell aggregates (Fig. 3A), compared to the presence of  
325 thicker and densely-packed biofilms with heterogeneous topography evident in the SEMs of  
326 electrodes sampled at 340 h. All the biofilms sampled at 340 h display similar estimated biofilm  
327 thickness of  $\sim 22 \mu\text{m}$ , with no statistically significant ( $P > 0.05$ ; t test) difference between  
328 electrodes, estimated from CLSM imaging (Fig. S4).

## 329 **2.4. Microbial community composition**

330 The early-stage (90 h) and later-stage (340 h) biofilms, as well as the initial anaerobic sludge  
331 inoculum, were subjected to 16S rRNA gene sequencing to probe the variation of microbial  
332 communities within films prior to, and over, the growth period. Relative abundance of microbes  
333 within the biofilms (Fig. 4A) show significant variations as a function of electrode terminal group  
334 chemistry and incubation time. The early-stage biofilms have a higher abundance of a genus  
335 closely related (99% sequence similarity) to *Desulfuromonas* sp. (dominant OTU), on the  
336 electrodes functionalized to introduce -NH<sub>2</sub>, -COOH and -OH groups compared to those of the -  
337 C<sub>2</sub>H<sub>5</sub> functionalized and control (unmodified) electrodes. There is evidence of the presence of  
338 known electroactive bacteria i.e., *Geobacter* sp., only for the early stage biofilms grown on -NH<sub>2</sub>,  
339 -C<sub>2</sub>H<sub>5</sub> and control (unmodified) electrodes. Both species were not detected in the inoculum.  
340 Selective enrichment of both species and differences in their relative abundance as a function of  
341 anode surface chemistry indicates that the anode local environment provides a niche-specific  
342 selective pressure for enrichment of a functionally stable bacterial community by growth on the  
343 anode surface rather than a random attachment of bacterial cells. For these early-stage biofilms, a  
344 clear correlation is evident between current density at the sampling time (90 h, see Fig. 1B) and  
345 measured cell density on the anodes (Fig. 4B). In addition there is a clear trend of higher relative  
346 abundance of *Desulfuromonas* sp., and current generation, as a function of the estimated zeta  
347 potential of the electrodes (Fig. 4C). This observation is supported by the principal components  
348 analysis (PCA) of the microbial community in the films (Fig. 4D) showing a clear distinction  
349 between the community in the inoculum and the early stage biofilm samples as well as a  
350 distinction between hydrophilic surfaces, dominated by *Desulfuromonas* sp., and the unmodified  
351 and hydrophobic -C<sub>2</sub>H<sub>5</sub> surfaces, dominated by *Geobacter* sp. For the later-stage biofilms,  
352 sampled after 340 h of reactor operation when the current density is similar for all electrodes, the

353 biofilm composition for all electrodes shifts to become dominated by *Desulfuromonas* sp. (65% –  
354 90%) (Fig. 4A).

355 The remarkable dominance of *Desulfuromonas* sp. prompted further investigation into its role.  
356 Subsequent cloning and sequencing of the early-stage biofilm sampled from the electrode  
357 functionalized to introduce -COOH terminal groups revealed the dominance of a species closely  
358 related (99% sequence similarity) to *Desulfuromonas acetexigens*. Although *D. acetexigens* has  
359 been previously identified in electrode-attached biofilms (Ishii et al., 2012; Ketep et al., 2013a)  
360 the specific localization of *D. acetexigens* in biofilms and its role in microbial electrochemical  
361 systems has yet to be investigated. Our attempts failed to isolate *D. acetexigens* strain from mixed  
362 culture biofilms using its natural electron acceptors through both solid/liquid growth approach.  
363 Thus, the pure culture of *D. acetexigens* (DSM 1397) purchased from DSMZ was used for  
364 conducting the electromicrobiology experiments.

365 Induction of growth of *D. acetexigens* bacterial biofilms on an unmodified graphite rod electrode  
366 surface was implemented by polarization of electrodes at -0.1 V vs. Ag/AgCl in three-electrode  
367 electrochemical cell configuration using *D. acetexigens* culture as inoculum and batch-feeding  
368 with acetate as substrate and energy source in an appropriate cell culture medium (see  
369 experimental details). The evolution of current over time, in this reactor, is similar to that  
370 observed for other pure culture electroactive bacteria under a continuous applied potential, such  
371 as *G. sulfurreducens* (Fricke et al., 2008; Jana et al., 2014; Katuri et al., 2010; Liu et al., 2008;  
372 Marsili et al., 2008) i.e., cycles of a rapid rise in current when acetate is introduced and then a  
373 relatively sharp fall as a consequence of acetate substrate depletion, as shown in Fig. 5A.  
374 Remarkably, relatively rapid initial current is observed without a substantial lag phase during the  
375 first batch of operation with a peak in the current density of  $9.2 \pm 0.4 \text{ A/m}^2$  obtained only  $19.3 \pm$   
376  $0.4 \text{ h}$  following initial inoculation into the reactor. Little significant further improvement to the

377 maximum current density during the batch-feed cycles is observed, with peak current density  
378 reaching a maximum of  $\sim 10 \text{ A/m}^2$  over the  $\sim 210 \text{ h}$  growth period in the reactor.

379 *In-situ* recording of slow-scan CVs at specific intervals (20 h, 74 h and 195 h) after initial  
380 inoculation provides the characteristic sigmoidal shape, indicative of microbial-electrocatalytic  
381 oxidation of acetate substrate by a *D. acetexigens* biofilm on the electrode surface (Fig. 5B), as  
382 observed for the mixed-culture biofilms. Examination of the first derivative of the CVs indicates  
383 the presence of a dominant redox transition with a half-wave potential of approximately  $-0.42 \text{ V}$   
384 vs Ag/AgCl (inset of Fig. 5C). The CVs in the presence of acetate show an increase in steady-  
385 state currents in progressing from the early-stage (20 h) biofilm to those recorded at later stages of  
386 growth (74 h and 195 h), an increase that is also observed in the fixed potential amperometric  
387 response at those sampling times (Fig. 5A). The non-turnover analysis of the later-stage biofilm  
388 (210 h after inoculation), by transfer into pH 7.0 phosphate buffer electrolyte lacking acetate as  
389 electron donor, shows three clear redox responses centered at  $\sim -0.58 \text{ V}$ ,  $-0.37 \text{ V}$  and  $-0.20 \text{ V}$  vs  
390 Ag/AgCl (Fig. 5D). No discernible redox response is observed in CVs recorded for the reactor  
391 bulk liquid.

392 The catalytic activity of *D. acetexigens* with formate or  $\text{H}_2$  (intermediates of anaerobic digestion  
393 process) as an electron donor was tested separately in a three-electrode electrochemical cell under  
394  $-0.1 \text{ V}$  vs. Ag/AgCl fixed anode potential. A maximum current density of  $4.4 \pm 0.3 \text{ A/m}^2$  was  
395 generated over a growth period of 26 h following inoculation (Fig. 6) using formate as electron  
396 donor. When the reactor feed was altered to include acetate as an electron donor instead of  
397 formate, maximum current density of  $10.6 \text{ mA/m}^2$  over a short period of reactor operation  
398 resulted. In a parallel experiment current generation practically ceased when feed was altered to  
399 include  $\text{H}_2$  as an electron donor instead of formate. Also no  $\text{H}_2$  consumption is observed during  
400 the test period. A similar behavior is observed for biofilms developed initially using acetate which  
401 is then altered to  $\text{H}_2$  as the electron donor (data not shown).



402

#### 403 **4. Discussion**

404 Electroactive bacteria attachment and biofilm formation is considered as a primary step in the  
405 microbial-electrode enrichment process. The key selective pressure for this electricigen  
406 enrichment in MES is extracellular electron transfer (EET) with the anode acting as an electron  
407 acceptor. The EET in electroactive biofilms is proposed to occur through production of  
408 exogenous mediators by the biofilms or through self-exchange between outer-membrane bound c-  
409 type cytochromes present on certain microbial cell surfaces facilitating electron transport through  
410 the film to the solid electrode surface and between cells at the interface between the biofilm and  
411 the solid-state anode (Nevin et al., 2009), with some postulating EET occurring by electronic  
412 conduction along structured protein channels (pili) (Sure et al., 2016). However, the crucial  
413 factors that control initial electrochemical current generation by interaction between the external  
414 bacterial cell surface and solid anodes is not yet clearly elucidated. Achieving insight into  
415 conditions that control this interaction is therefore crucial for shaping the anodic microbial  
416 community and improving MES technology.

417 Results presented here demonstrate that terminal group chemistry on graphite electrodes  
418 influences the microbial community composition and relative abundance during the early-stage of  
419 biofilm formation and growth, (Fig. 1B and Fig. 4), for biofilms grown under fixed applied  
420 potential in a single chamber electrochemical cell using an inoculum harvested from an anaerobic  
421 digester treating dairy plant wastewaters, confirming observations by others using a range of  
422 inocula and conditions (Guo et al., 2013; Picot et al., 2011; Santoro et al., 2015). The majority of  
423 electroactive bacteria reported to be present in anodic biofilms are gram negative (Read et al.,  
424 2010), possessing negatively charged bacterial cell surfaces (Santoro et al., 2015). Thus,  
425 positively charged electrode surfaces are thought to promote strong electrostatic interactions  
426 between the electrode surface and the negatively charged electroactive bacteria (Guo et al., 2013;

427 Kumar et al., 2013; Lapinonnière et al., 2013; Picot et al., 2011; Santoro et al., 2015). However,  
428 Guo et al., report that start-up of current generation is more rapid on glassy carbon electrodes  
429 functionalized to introduce hydrophilic ( $-\text{N}(\text{CH}_3)_3^+$ ,  $-\text{OH}$  and  $-\text{SO}_3$ ) groups, regardless of the  
430 charge on the functional group (Guo et al., 2013), compared to start-up on  $-\text{CH}_3$  terminated  
431 surfaces, and this was confirmed by Santoro et al., using self-assembled monolayers on gold  
432 (Santini et al., 2015). We find that graphite electrodes functionalized to introduce  $-\text{NH}_2$ ,  $-\text{COOH}$   
433 and  $-\text{OH}$  display higher currents during initial stage of biofilm growth, under batch-feeding of  
434 acetate as electron donor, compared to electrodes functionalized to introduce  $-\text{C}_2\text{H}_5$  and  
435 unmodified graphite electrodes, under the same operating conditions (Fig. 1 & Fig. 4 B&C). The  
436 capacity to permit cell growth, and to generate current is clearly related to the surface charge on  
437 the electrodes, as represented by the zeta potential measured in the growth medium (Fig. 4C),  
438 with the  $-\text{C}_2\text{H}_5$  and bare electrodes displaying the more negative zeta potentials. It does not appear  
439 that the current generation is related to the sign of the charge on the surface terminal group, as the  
440  $-\text{NH}_2$  and  $-\text{OH}$  groups are expected to be neutral while the  $-\text{COOH}$  groups are expected to be de-  
441 protonated and negative under the cell culture medium conditions (pH 6.8). The ability to  
442 promote preferential electroactive bacteria attachment during the initial phase of colonization may  
443 therefore be through capacity to interact electrostatically, for example through formation of  
444 hydrogen bonds, with the bacterial cell surface, noting that the dipole moment of each of aniline,  
445 phenylpropionic acid and benzylalcohol, presumed to be the dominant terminal molecules at the -  
446  $\text{NH}_2$  and  $-\text{COOH}$  and  $-\text{OH}$  functionalized electrodes, is above 1.5 D while the dipole moment for  
447 ethylbenzene, present at the  $-\text{C}_2\text{H}_5$  functionalized electrode, is 0.58 D (Ray, 2017). It has been  
448 highlighted that *Shewanella loihica PV-4* has capability to generate five-fold higher current on a  
449 hydrophilic compared to that on a hydrophobic electrode under fixed anode potential growth  
450 conditions (Ding et al., 2015). Thus local polarity is a crucial factor in inducing preferential

451 colonization of electrodes by electroactive bacteria, enhancing current during the early-stage of  
452 electroactive biofilm growth.

453 The voltammetric analysis at low, or absent, acetate levels, for early stage biofilms show a redox  
454 signal centered at potential of -0.43 V vs Ag/AgCl similar to that observed for biofilms induced to  
455 grow from pure culture of *G. sulfurreducens* (Fricke et al., 2008; Katuri et al., 2010; Marsili et al.,  
456 2008) or *G. anodireducens* (Sun et al., 2014), as well as a signal at  $\sim$  -0.2 V vs Ag/AgCl that  
457 resembles the redox peak observed with the filtered biofilm-extracted solution, indicating that the  
458 biofilms produce an extracellular, water soluble, mediator. The redox potential of the detected  
459 mediator is comparable to that of phenazine-type redox mediators secreted by a range of microbes  
460 (Wang et al., 2010), including *Pseudomonadaceae* microbes, which have been detected to be  
461 present in the biofilms (Fig. 4A).

462 The effect of experimental conditions such as inoculum selection, anode surface charge (Guo et  
463 al., 2013), electrode nano/micro-scale topography (Champigneux et al., 2018) and cell surface  
464 polarizability (Wang et al., 2019) on the microbial composition in electroactive biofilms is not as  
465 yet widely understood. For example, Guo et al., studied the microbial community composition of  
466 anodic biofilms developed on a range of surface functionalized glassy carbon electrodes (-  
467  $\text{N}(\text{CH}_3)_3^+$ , -OH, -SO<sub>3</sub> and -CH<sub>3</sub>) and found predominance of *Geobacter* sp., in the biofilms after  
468 52 days of operation, irrespective of functionalized anode tested, but with a lower predominance  
469 in -CH<sub>3</sub> functionalized electrodes (Guo et al., 2013). This is presumably because of seeding of  
470 reactor with effluent from an actively operating (more than a year) acetate-fed microbial  
471 electrochemical system. However, in our study, noticeable differences in the relative abundance  
472 of *Desulfuromonas* sp., (-COOH > -OH > -NH<sub>2</sub> > Control > -C<sub>2</sub>H<sub>5</sub>) and *Geobacter* sp., (Control >  
473 -C<sub>2</sub>H<sub>5</sub> > -NH<sub>2</sub> > -COOH > -OH) is found for the early stage anodic biofilms formed on  
474 functionalized electrodes (Fig. 4A) suggesting that the micro-environment (i.e., polarity,

475 hydrophilicity, charge, etc.) can stimulate adhesion as well as viability of *Desulfuromonas* sp.,  
476 over that of *Geobacter* sp.

477 When the biofilms are matured, over the 340 h growth period, there is greater similarity in the  
478 communities detected within the films (Fig. 4A & D), as well as in the currents generated (Fig. 1)  
479 due to convergence of biofilm microbial composition predominantly to *Desulfuromonas* sp., This  
480 result strongly signifies that a single bacterial genus, i.e., *Desulfuromonas* sp., is the major  
481 contributor to current generation in these biofilms. Subsequent cloning and sequencing of the  
482 early-stage biofilm sampled from the electrode functionalized to introduce -COOH groups  
483 revealed the dominant species as *D. acetexigens*. Colonization by *D. acetexigens* in the early stage  
484 of biofilm formation could limit species diversity within the biofilms over the growth period by  
485 competing for the space and electron donor on the polarized anode surfaces perhaps because of a  
486 superior anode-respiring capability over *Geobacter* sp. A similar trend was reported by Ishii et al.,  
487 with a shift in dominance from *Geobacter* sp. towards a phylotype closely related to *D.*  
488 *acetexigens* in the anodic biofilm after long term operation (> 200 days) of single-chamber, air-  
489 cathode MFCs using primary clarifier effluent as a source of feed and inoculum, and carbon cloth  
490 as anode (Ishii et al., 2012). The same team (Ishii et al., 2014) had reported that the relative  
491 abundance of *D. acetexigens* over *Geobacter* sp. in an anodic biofilm increased over 3 months of  
492 acetate feed operation in a MFC inoculated with a sediment slurry from a lagoon.

493 *D. acetexigens* is a gram-negative bacterium belonging to the family *Desulfuromonadaceae* (class  
494 *Deltaproteobacteria*). It has been detected in freshwater sediments and digester sludge of  
495 wastewater treatment plants, and links acetate oxidation to sulfur reduction (Finster et al., 1994).  
496 The existence of *Desulfuromonas* sp., at low relative abundance has been reported in the anodic  
497 biofilms where domestic sewage (Ishii et al., 2012; Ketep et al., 2013a), raw paper mill effluents  
498 (Ketep et al., 2013a; b) and lagoon sediment (Ishii et al., 2014) were used as the source of  
499 inoculum. There have been no reports, to date, characterizing the performance of biofilms of pure

500 *D. acetexigens* induced to grow on electrodes. The electrochemical activity of *D. acetexigens*  
501 films induced to grow from a pure culture inoculum on graphite electrodes is reported here (Fig.  
502 5A&C). The amperometric and voltammetric signals confirm that *D. acetexigens* has the ability to  
503 use a graphite anode as an electron acceptor in the presence of acetate as electron donor, respiring  
504 on the anode, providing evidence that this bacterium is responsible for such signals observed for  
505 biofilms in previous reports (Ishii et al., 2012; Ishii et al., 2014; Ketep et al., 2013a; b). The slow-  
506 scan voltammetry of biofilms in the presence of acetate display a half-wave redox potential of -  
507 0.42 V vs Ag/AgCl comparable to that observed for the biofilms grown using the anaerobic  
508 sludge as inoculum on the graphite electrode (Fig. 2) and to redox potentials reported for  
509 membrane bound redox proteins expressed by other electroactive bacteria (Katari et al., 2010).  
510 Non-turnover voltammetry of *D. acetexigens* biofilms (Fig. 5D) show redox peaks centered at ~ -  
511 0.58 V, -0.37 V and -0.20 V vs Ag/AgCl representing presence of a number of redox moieties at  
512 potentials comparable to those reported for biofilms of *G. sulfurreducens* (Fricke et al., 2008;  
513 Katari et al., 2012). Remarkably, rapid onset of current to generate ~ 9 A/m<sup>2</sup> in less than 20 h  
514 after start-up is observed with formation of a thin layer of adhered cells (Fig. 5B). However,  
515 further improvement in biofilm growth followed by fed-batch operation did not significantly  
516 improve the magnitude of the current generation. A current density of ~ 9.7 A/m<sup>2</sup> is observed for  
517 a ~ 60 h aged biofilm having a thickness of ~10 μm (Fig. 5E). Although comparisons are difficult  
518 because of different conditions (cell configuration, electrodes, medium, inoculum and its cell  
519 density and growth phase etc.), the start-up of *D. acetexigens* for current generation is faster than  
520 using pure cultures of *G. sulfurreducens*. For example, for *G. sulfurreducens* current density of up  
521 to ~ 5 A/m<sup>2</sup> is achieved after 72 hours of growth at an applied potential of 0 V vs. Ag/AgCl at  
522 graphite electrodes using a high proportion of inoculum in a batch feed mode (Marsili et al.,  
523 2008), while a current density of ~ 9 A/m<sup>2</sup> is generated only after 142 h (Katari et al., 2012) or 85

524 h (Jana et al., 2014) of repeated batch mode experiments at an applied potential of 0 V vs.  
525 Ag/AgCl at graphite electrodes.

526 The current generation using formate as electron donor (Fig. 6) confirms that *D. acetexigens* can  
527 link formate oxidation with anode respiration. However, a 2.5 fold increase in current density  
528 generation achieved for *D. acetexigens* biofilms when formate is replaced with the same electron  
529 equivalent acetate concentration suggests that *D. acetexigens* biofilms are more active with  
530 acetate as the electron donor. Recycling of H<sub>2</sub> as the electron donor by *G. sulfurreducens*, a well-  
531 studied electroactive bacteria, can adversely affect the energy harnessed in a single-chambered  
532 MEC. The inability of *D. acetexigens* biofilms to use H<sub>2</sub> for current generation provides  
533 opportunity to maximize recovery of wastewater energy as H<sub>2</sub> using MET.

534

535

536

## 537 **5. Conclusion**

538 Results show a clear influence of functionalization of anodes on primary adhesion of microbes  
539 during the early stage of biofilm formation for electricigenesis, providing differences in onset of  
540 current and time to achieve maximum, steady-state, current. Although we do not yet know  
541 whether functionalized electrodes can be used to differentially stimulate enrichment of one  
542 electroactive bacterium over another, or rate of anodic biofilm formation from different inoculum  
543 sources, the results obtained in this study using anaerobic sludge as inoculum suggest that  
544 biomass adhesion as well as its activity, biofilm morphology (i.e. spatial distribution of cells) and  
545 relative abundance of electroactive bacteria during the early stage of biofilm formation are clearly  
546 affected by the anode surface characteristics. More importantly, the hydrophilic surfaces promote  
547 rapid start-up of current generation. Although the underlying mechanism is unclear, anodes  
548 functionalized with hydrophilic terminal groups result in the enrichment of a *Desulfuromonas* sp.

549 in the biofilm compared to initial dominance of *Geobacter* sp. on more hydrophobic electrodes.  
550 This *Desulfuromonas* sp. is identified to be *D. acetexigens*, and the study of early-stage biofilms  
551 of this species is presented confirming its electroactive response. Superior electrocatalytic  
552 performance with distinct anode respiring properties of *D. acetexigens* biofilms will prove  
553 advantageous for microbial-anode performance in METs. Identification of selection pressure to  
554 increase the abundance of *D. acetexigens* in anodic biofilms (perhaps through bio-augmentation  
555 or identifying the optimal differential growth conditions) can maximize resource recovery from  
556 the wastes. For example, metabolic activities of *D. acetexigens* biofilms (such as efficient EET  
557 properties and absence of H<sub>2</sub> recycling as an electron donor) will favor maximum recovery of  
558 energy as H<sub>2</sub> in single-chambered MEC systems for wastewater treatment.

559

560

561

## 562 **Acknowledgments**

563 This work was supported by the Center Competitive Funding Program (Grant No. FCC/1/1971-  
564 05-01) and the Competitive Research Grant (URF/1/2985-01-01) from King Abdullah University  
565 of Science and Technology (KAUST) and by a Charles Parsons Energy Research Award, through  
566 Science Foundation Ireland.

567

## 568 **References**

569 Artyushkova, K., Cornejo, J.A., Ista, L.K., Babanova, S., Santoro, C., Atanassov, P. and Schuler,  
570 A.J. 2015. Relationship between surface chemistry, biofilm structure, and electron  
571 transfer in *Shewanella* anodes. *Biointerphases* 10(1).  
572 Boland, S., Barrière, F. and Leech, D. 2008. Designing Stable Redox-Active Surfaces: Chemical  
573 Attachment of an Osmium Complex to Glassy Carbon Electrodes Prefunctionalized by  
574 Electrochemical Reduction of an In Situ-Generated Aryldiazonium Cation. *Langmuir*  
575 24(12), 6351-6358.  
576 Champigneux, P., Delia, M.-L. and Bergel, A. 2018. Impact of electrode micro- and nano-scale  
577 topography on the formation and performance of microbial electrodes. *Biosensors and*  
578 *Bioelectronics* 118, 231-246.

- 579 Cornejo, J.A., Lopez, C., Babanova, S., Santoro, C., Artyushkoya, K., Ista, L., Schuler, A.J. and  
580 Atanassov, P. 2015. Surface Modification for Enhanced Biofilm Formation and Electron  
581 Transport in *Shewanella* Anodes. *J Electrochem Soc* 162(9), H597-H603.
- 582 Dhar, B.R., Sim, J., Ryu, H., Ren, H., Santo Domingo, J.W., Chae, J. and Lee, H.-S. 2017.  
583 Microbial activity influences electrical conductivity of biofilm anode. *Water Research*  
584 127, 230-238.
- 585 Ding, C.-m., Lv, M.-l., Zhu, Y., Jiang, L. and Liu, H. 2015. Wettability-Regulated Extracellular  
586 Electron Transfer from the Living Organism of *Shewanella loihica* PV-4. *Angewandte*  
587 *Chemie International Edition* 54(5), 1446-1451.
- 588 Dumitru, A. and Scott, K. (2016) *Microbial Electrochemical and Fuel Cells*. Scott, K. and Yu,  
589 E.H. (eds), pp. 117-152, Woodhead Publishing, Boston.
- 590 Finster, K., Bak, F. and Pfennig, N. 1994. *Desulfuromonas acetexigens* sp. nov., a dissimilatory  
591 sulfur-reducing eubacterium from anoxic freshwater sediments. *Archives of Microbiology*  
592 161(4), 328-332.
- 593 Fricke, K., Harnisch, F. and Schröder, U. 2008. On the use of cyclic voltammetry for the study  
594 of anodic electron transfer in microbial fuel cells. *Energy and Environmental Science* 1,  
595 144-147.
- 596 Guo, K., Freguia, S., Dennis, P., Chen, X., Donose, B., Keller, J., Gooding, J. and Rabaey, K.  
597 2013. Effects of Surface Charge and Hydrophobicity on Anodic Biofilm Formation,  
598 Community Composition, and Current Generation in Bioelectrochemical Systems.  
599 *Environmental science & technology* 47.
- 600 Ishii, S.i., Suzuki, S., Norden-Krichmar, T.M., Nealson, K.H., Sekiguchi, Y., Gorby, Y.A. and  
601 Bretschger, O. 2012. Functionally Stable and Phylogenetically Diverse Microbial  
602 Enrichments from Microbial Fuel Cells during Wastewater Treatment. *PLOS ONE* 7(2),  
603 e30495.
- 604 Ishii, S.i., Suzuki, S., Norden-Krichmar, T.M., Phan, T., Wanger, G., Nealson, K.H., Sekiguchi,  
605 Y., Gorby, Y.A. and Bretschger, O. 2014. Microbial population and functional dynamics  
606 associated with surface potential and carbon metabolism. *The ISME Journal* 8(5), 963-  
607 978.
- 608 Jana, P.S., Katuri, K., Kavanagh, P., Kumar, A. and Leech, D. 2014. Charge transport in films of  
609 *Geobacter sulfurreducens* on graphite electrodes as a function of film thickness. *Phys*  
610 *Chem Chem Phys* 16(19), 9039-9046.
- 611 Katuri, K.P., Ali, M. and Saikaly, P.E. 2019. The role of microbial electrolysis cell in urban  
612 wastewater treatment: integration options, challenges, and prospects. *Curr Opin Biotech*  
613 57, 101-110.
- 614 Katuri, K.P., Kalathil, S., Ragab, A., Bian, B., Alqahtani, M.F., Pant, D. and Saikaly, P.E. 2018.  
615 Dual-Function Electrocatalytic and Macroporous Hollow-Fiber Cathode for Converting  
616 Waste Streams to Valuable Resources Using Microbial Electrochemical Systems. *Adv*  
617 *Mater* 30(26).
- 618 Katuri, K.P., Kavanagh, P., Rengaraj, S. and Leech, D. 2010. *Geobacter sulfurreducens* biofilms  
619 developed under different growth conditions on glassy carbon electrodes: insights using  
620 cyclic voltammetry. *Chem Commun* 46(26), 4758-4760.
- 621 Katuri, K.P., Rengaraj, S., Kavanagh, P., O'Flaherty, V. and Leech, D. 2012. Charge Transport  
622 through *Geobacter sulfurreducens* Biofilms Grown on Graphite Rods. *Langmuir* 28(20),  
623 7904-7913.
- 624 Katuri, K.P., Werner, C.M., Jimenez-Sandoval, R.J., Chen, W., Jeon, S., Logan, B.E., Lai, Z.P.,  
625 Army, G.L. and Saikaly, P.E. 2014. A Novel Anaerobic Electrochemical Membrane  
626 Bioreactor (AnEMBR) with Conductive Hollow-fiber Membrane for Treatment of Low-  
627 Organic Strength Solutions. *Environmental Science & Technology* 48(21), 12833-12841.



- 528 Ketep, S.F., Bergel, A., Bertrand, M., Achouak, W. and Fourest, E. 2013a. Lowering the applied  
529 potential during successive scratching/re-inoculation improves the performance of  
530 microbial anodes for microbial fuel cells. *Bioresource Technology* 127, 448-455.
- 531 Ketep, S.F., Bergel, A., Bertrand, M., Achouak, W. and Fourest, E. 2013b. Sampling location of  
532 the inoculum is crucial in designing anodes for microbial fuel cells. *Biochemical  
533 Engineering Journal* 73, 12-16.
- 534 Koch, C. and Harnisch, F. 2016. Is there a Specific Ecological Niche for Electroactive  
535 Microorganisms? *ChemElectroChem* 3(9), 1282-1295.
- 536 Kumar, A., Conghaile, P.O., Katuri, K., Lens, P. and Leech, D. 2013. Arylamine  
537 functionalization of carbon anodes for improved microbial electrocatalysis. *Rsc Adv*  
538 3(41), 18759-18761.
- 539 Lapinsonnière, L., Picot, M., Poriel, C. and Barrière, F. 2013. Phenylboronic Acid Modified  
540 Anodes Promote Faster Biofilm Adhesion and Increase Microbial Fuel Cell Performances.  
541 *Electroanalysis* 25(3), 601-605.
- 542 Liu, Y., Harnisch, F., Fricke, K., Sietmann, R. and Schröder, U. 2008. Improvement of the  
543 anodic bioelectrocatalytic activity of mixed culture biofilms by a simple consecutive  
544 electrochemical selection procedure. *Biosensors and Bioelectronics* 24(4), 1006-1011.
- 545 Ma, J., Wang, Z., He, D., Li, Y. and Wu, Z. 2015. Long-term investigation of a novel  
546 electrochemical membrane bioreactor for low-strength municipal wastewater treatment.  
547 *Water Research* 78, 98-110.
- 548 Malaeb, L., Katuri, K.P., Logan, B.E., Maab, H., Nunes, S.P. and Saikaly, P.E. 2013. A Hybrid  
549 Microbial Fuel Cell Membrane Bioreactor with a Conductive Ultrafiltration Membrane  
550 Biocathode for Wastewater Treatment. *Environmental Science & Technology* 47(20),  
551 11821-11828.
- 552 Marsili, E., Rollefson, J.B., Baron, D.B., Hozalski, R.M. and Bond, D.R. 2008. Microbial  
553 Biofilm Voltammetry: Direct Electrochemical Characterization of Catalytic Electrode-  
554 Attached Biofilms. *Applied and Environmental Microbiology* 74(23), 7329.
- 555 Miceli, J.F., Parameswaran, P., Kang, D.-W., Krajmalnik-Brown, R. and Torres, C.I. 2012.  
556 Enrichment and Analysis of Anode-Respiring Bacteria from Diverse Anaerobic Inocula.  
557 *Environmental Science & Technology* 46(18), 10349-10355.
- 558 Nevin, K., Kim, B.-C., Glaven, R., Johnson, J., Woodard, T., Methé, B., Didonato, R., Covalla,  
559 S., Franks, A., Liu, A. and Lovley, D. 2009. Anode biofilm transcriptomics reveals outer  
560 surface components essential for high density current production in *Geobacter*  
561 *sulfurreducens* fuel cells. *PloS one* 4, e5628.
- 562 Park, D.H., Kim, S.K., Shin, I.H. and Jeong, Y.J. 2000. Electricity production in biofuel cell  
563 using modified graphite electrode with Neutral Red. *Biotechnology Letters* 22(16), 1301-  
564 1304.
- 565 Patil, S.A., Harnisch, F., Kapadnis, B. and Schröder, U. 2010. Electroactive mixed culture  
566 biofilms in microbial bioelectrochemical systems: The role of temperature for biofilm  
567 formation and performance. *Biosensors and Bioelectronics* 26(2), 803-808.
- 568 Picot, M., Lapinsonnière, L., Rothballer, M. and Barrière, F. 2011. Graphite anode surface  
569 modification with controlled reduction of specific aryl diazonium salts for improved  
570 microbial fuel cells power output. *Biosensors and Bioelectronics* 28(1), 181-188.
- 571 Ray, A.K. (2017) *Springer Handbook of Electronic and Photonic Materials*. Kasap, S. and  
572 Capper, P. (eds), pp. 1-1, Springer International Publishing, Cham.
- 573 Read, S.T., Dutta, P., Bond, P.L., Keller, J. and Rabaey, K. 2010. Initial development and  
574 structure of biofilms on microbial fuel cell anodes. *BMC Microbiol* 10, 98-98.
- 575 Rittmann, B.E. 2018. Biofilms, active substrata, and me. *Water Research* 132, 135-145.

- 576 Saito, T., Mehanna, M., Wang, X., Cusick, R.D., Feng, Y., Hickner, M.A. and Logan, B.E. 2011.  
577 Effect of nitrogen addition on the performance of microbial fuel cell anodes. *Bioresource*  
578 *Technology* 102(1), 395-398.
- 579 Santini, M., Guilizzoni, M., Lorenzi, M., Atanassov, P., Marsili, E., Fest-Santini, S., Cristiani, P.  
580 and Santoro, C. 2015. Three-dimensional X-ray microcomputed tomography of  
581 carbonates and biofilm on operated cathode in single chamber microbial fuel cell.  
582 *Biointerphases* 10(3).
- 583 Santoro, C., Babanova, S., Artyushkova, K., Cornejo, J.A., Ista, L., Bretschger, O., Marsili, E.,  
584 Atanassov, P. and Schuler, A.J. 2015. Influence of anode surface chemistry on microbial  
585 fuel cell operation. *Bioelectrochemistry* 106(Pt A), 141-149.
- 586 Schröder, U., Harnisch, F. and Angenent, L.T. 2015. Microbial electrochemistry and technology:  
587 terminology and classification. *Energ Environ Sci* 8(2), 513-519.
- 588 Scott, K., Rimbu, G.A., Katuri, K.P., Prasad, K.K. and Head, I.M. 2007. Application of modified  
589 carbon anodes in microbial fuel cells. *Process Saf Environ* 85(B5), 481-488.
- 590 Shaw, D.R., Ali, M., Katuri, K.P., Gralnick, J.A., Reimann, J., Mesman, R., van Niftrik, L.,  
591 Jetten, M.S.M. and Saikaly, P.E. 2019. Extracellular electron transfer-dependent  
592 anaerobic oxidation of ammonium by anammox bacteria. *bioRxiv*, 855817.
- 593 Shehab, N.A., Ortiz-Medina, J.F., Katuri, K.P., Hari, A.R., Amy, G., Logan, B.E. and Saikaly,  
594 P.E. 2017. Enrichment of extremophilic exoelectrogens in microbial electrolysis cells  
595 using Red Sea brine pools as inocula. *Bioresource Technology* 239, 82-86.
- 596 Sun, D., Call, D., Wang, A., Cheng, S. and Logan, B.E. 2014. *Geobacter* sp. SD-1 with  
597 enhanced electrochemical activity in high-salt concentration solutions. *Environmental*  
598 *Microbiology Reports* 6(6), 723-729.
- 599 Sure, S., Ackland, M.L., Torriero, A.A.J., Adholeya, A. and Kochar, M. 2016. Microbial  
700 nanowires: an electrifying tale. *Microbiology* 162(12), 2017-2028.
- 701 Torres, C.I., Marcus, A.K., Lee, H.-S., Parameswaran, P., Krajmalnik-Brown, R. and Rittmann,  
702 B.E. 2010. A kinetic perspective on extracellular electron transfer by anode-respiring  
703 bacteria. *FEMS Microbiology Reviews* 34(1), 3-17.
- 704 Vilajeliu-Pons, A., Koch, C., Balaguer, M.D., Colprim, J., Harnisch, F. and Puig, S. 2018.  
705 Microbial electricity driven anoxic ammonium removal. *Water Research* 130, 168-175.
- 706 Wang, Q., Jones, A.-A.D., Gralnick, J.A., Lin, L. and Buie, C.R. 2019. Microfluidic  
707 dielectrophoresis illuminates the relationship between microbial cell envelope  
708 polarizability and electrochemical activity. *Science Advances* 5(1), eaat5664.
- 709 Wang, Y., Kern, S.E. and Newman, D.K. 2010. Endogenous Phenazine Antibiotics Promote  
710 Anaerobic Survival of *Pseudomonas aeruginosa* via Extracellular Electron  
711 Transfer. *Journal of Bacteriology* 192(1), 365-369.
- 712 Zhang, J., Zhang, E., Scott, K. and Burgess, J.G. 2012. Enhanced Electricity Production by Use  
713 of Reconstituted Artificial Consortia of Estuarine Bacteria Grown as Biofilms.  
714 *Environmental Science & Technology* 46(5), 2984-2992.

715

716

717

718

719

720

721

722

723

724

725

726

727

728

729

730

731

732

733

734

735

## 736 TOC – Graphical abstract

737

738

739

740

741

742

743

744

745

746

747

748

749

750

751

752

753

754

755

756

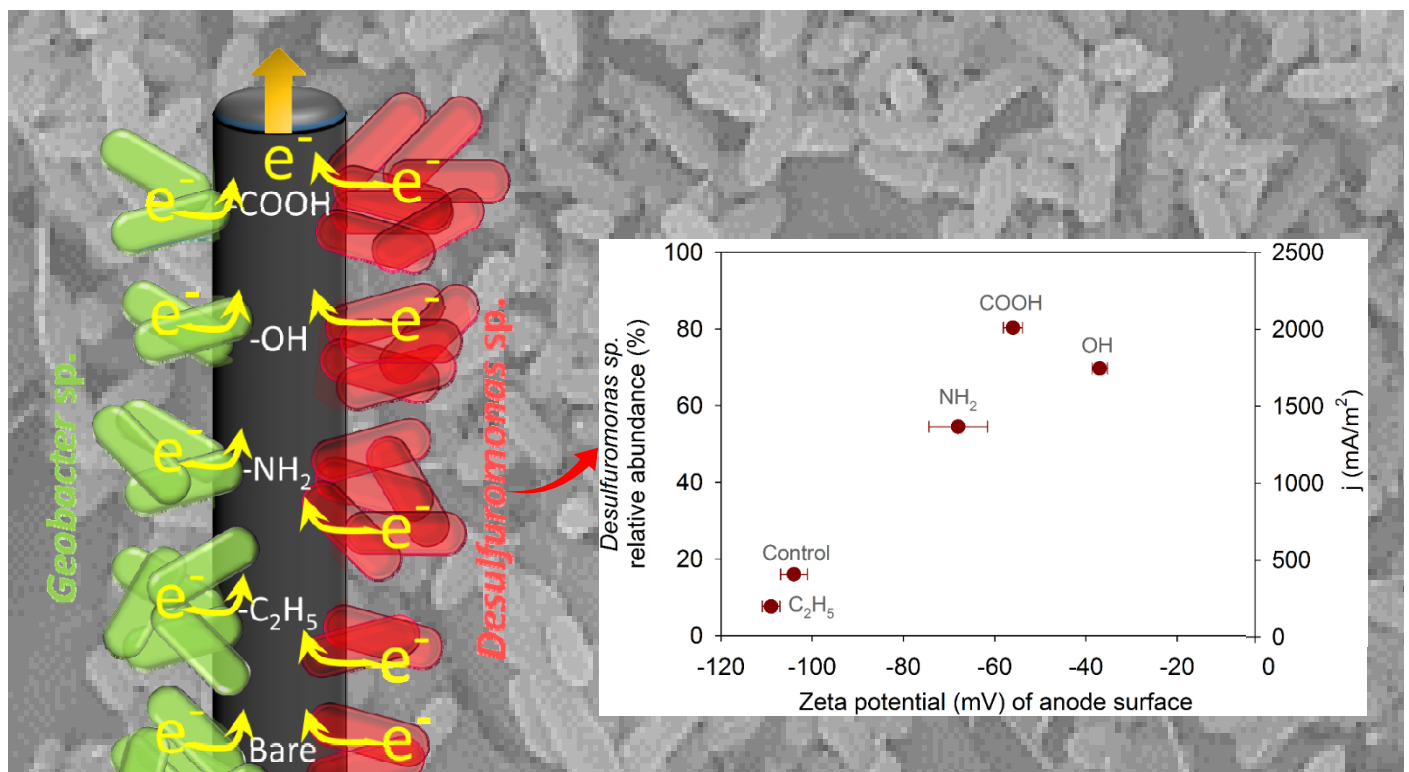

757  
758  
759  
760  
761  
762  
763  
764  
765  
766  
767  
768  
769  
770  
771  
772  
773  
774  
775  
776  
777  
778  
779  
780  
781  
782  
783  
784

1 **Electroactive biofilms on surface functionalized anodes: the**  
2 **anode respiring behavior of a novel electroactive bacterium,**  
3 ***Desulfuromonas acetexigens***

4  
5 **Krishna P. Katuri<sup>a,b</sup>, Sirisha Kamireddy<sup>a,b</sup>, Paul Kavanagh<sup>a†</sup>, Ali Mohammad<sup>b</sup>, Peter Ó**  
6 **Conghaile<sup>a</sup>, Amit Kumar<sup>a</sup>, Pascal E. Saikaly<sup>b\*</sup> and Dónal Leech<sup>a\*</sup>**

7  
8  
9  
10  
11  
12  
13  
14  
15  
16  
17  
18  
19  
20  
21  
22  
23  
24  
25  
26  
27  
28  
29  
30  
31  
32  
33  
34  
35  
36  
37  
38  
39  
40  
41  
42

## Figures

Fig. 1. Amperometric response of bare and functionalized graphite electrodes polarized at an applied potential of  $-0.1$  V vs Ag/AgCl. (A), Response for initial start-up, (B), after removal of inoculum and replenishment of acetate and (C), when switching from batch feed to continuous flow feed at a flow rate of 1 L/day, switching to 0.5 L/day at the time indicated by the black arrow. Grey arrow in Figure 1B indicates the time when the biofilms were sampled for SEM and microbial community analysis. Numbers in Figure 1B&C represent the time where CV analysis conducted for the biofilms.

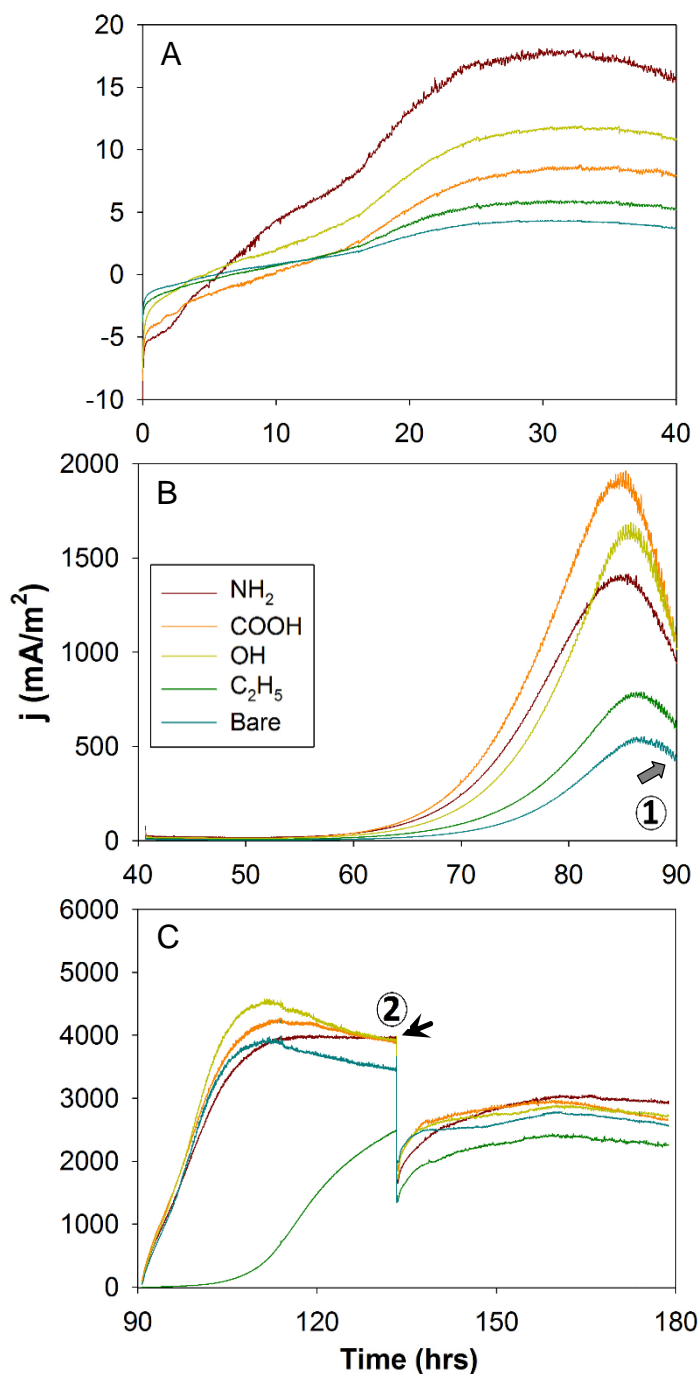

93 Fig. 2. Slow scan CV (1 mV/s) for the -OH functionalized graphite electrodes. (A), Recorded  
94 following early-stage growth (90 h) under substrate limiting conditions at the end of the batch  
95 feed and non-turnover conditions in the absence of acetate as electron donor. (B), CV of 140 h,  
96 190 h and 250 h aged biofilms (see Figure S2) in the presence of 10 mM acetate as electron  
97 donor.

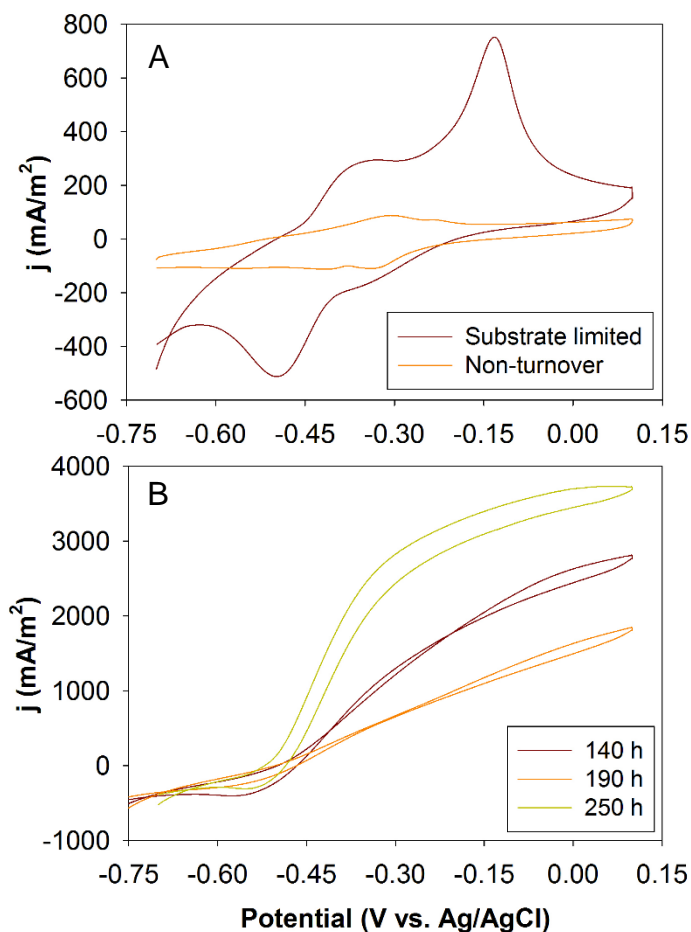

143  
144 Fig. 3. SEM images for biofilm covered control (unmodified) and functionalized graphite  
145 electrodes. (A), Biofilms sampled after early-stage (90 h) or (B), later-stage (340 h) biofilm  
146 growth conditions (see Fig. 1B and Fig. S2 for details).  
147

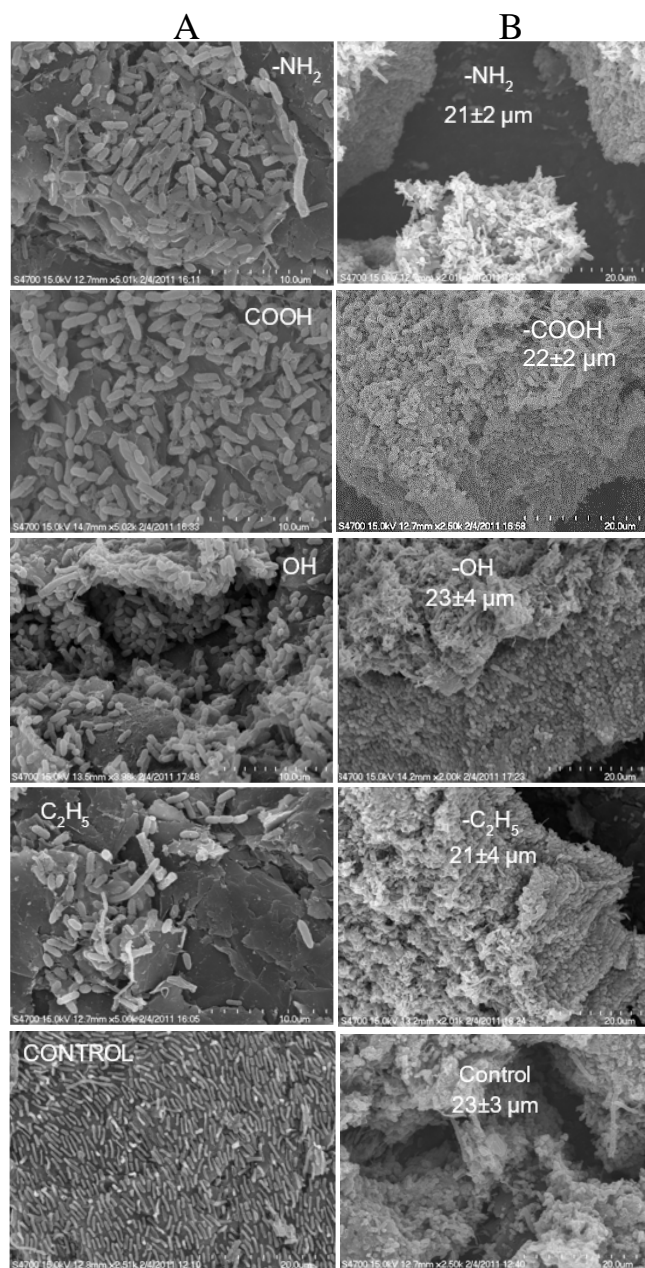



Fig. 4. (A), Heat map displaying relative abundance of bacterial reads. The genus level (or lowest taxonomic level possible) relative abundance for inoculum and for biofilms sampled from control (unmodified) and functionalized graphite electrodes after early-stage of batch-feed (90 h) and later-stage of continuous feed (340 h) growth conditions. *k*: kingdom, *p*: phylum, *c*: class, *o*: order and *f* family. (B & C), Influence of anode (unmodified and functionalized graphite electrodes) on biomass growth or zeta potential and its impact on current density after early-stage batch-feed (90 h) growth conditions. Relationship between anode and cell density, and its influence on current production. (B), and correlation between anode surface zeta potential and relative abundance of *Desulfuromonas* sp. and its stimulus on current production (C). (D), PCA analysis showing relationship between biofilm bacterial communities collected over time (90 h and 340 h) and from different electrode (unmodified and functionalized graphite) surfaces. Inoculum sample is also included in the PCA plot.

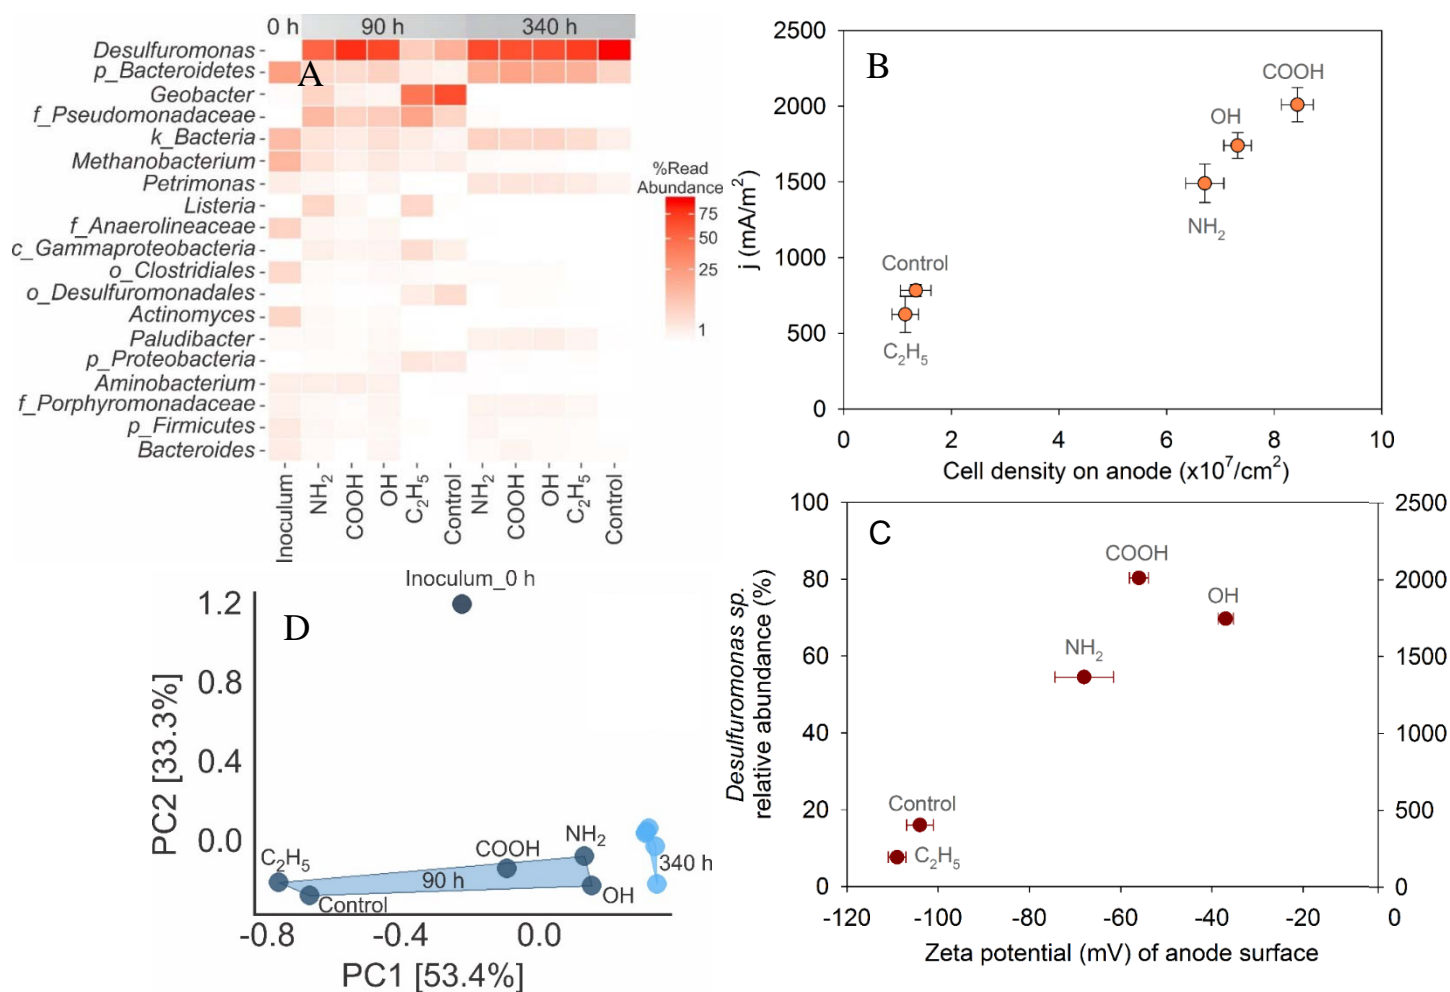

243  
244 Fig. 5. Electrochemical behavior of *D. acetexigens* biofilms. (A), Amperometric response of  
245 graphite rod electrodes in the electrochemical reactor, at an applied potential of  $-0.1$  V vs  
246 Ag/AgCl, during batch-feed operation, where the arrows represent change of feed. (B), SEM  
247 image of electrode sampled at time indicated by (1) in (A). (C), *In-situ* CVs (1 mV/s) conducted  
248 at times indicated by (1), (3) and (4) in (A), with inset representing the first derivative of the CVs.  
249 (D), Non-turnover CV (1 mV/s) recorded in anaerobic phosphate buffer (100 mM, pH 7.0) for the  
250 electrode sampled 210 h after inoculation. (E), CLSM image of  $\sim 60$  h aged biofilm sampled at  
251 time indicated by (2) in (A).  
252  
253

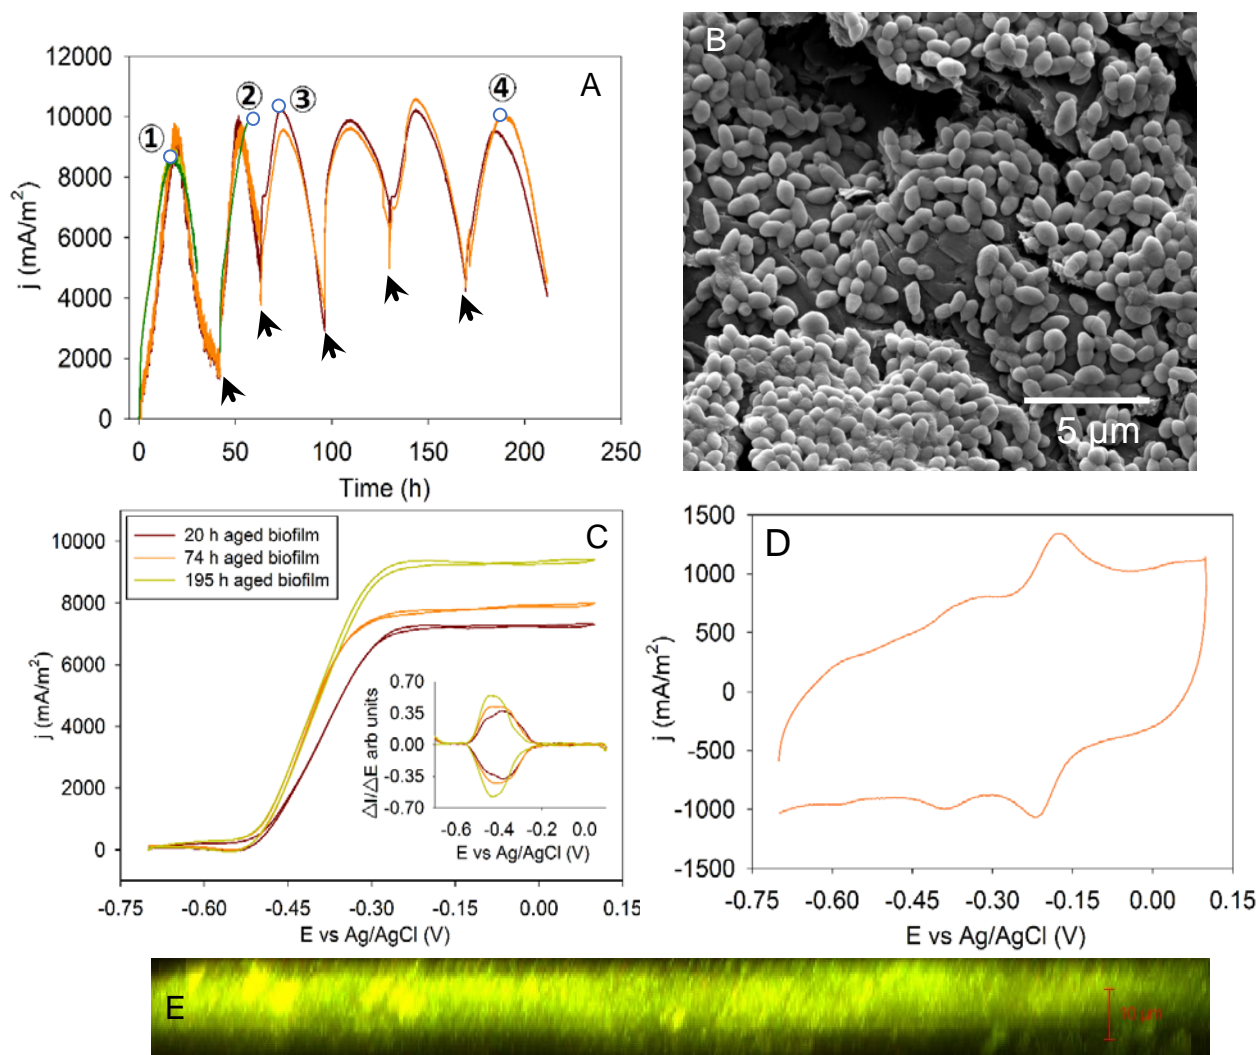

293  
294  
295  
296  
297  
298  
299  
300  
301  
302  
303  
304

Fig. 6. Amperometric response of *D. acetexigens* biofilms grown on graphite rod electrodes at an applied potential of -0.1 V vs Ag/AgCl in the electrochemical reactor during batch-feed operation. Black arrows represent change of feed. Gray represents the time when respective biofilms switched to acetate or H<sub>2</sub> as an electron donor instead of formate. The same electron equivalent substrate concentration (i.e., 20 mM formate and 5 mM acetate) is used for the tests.

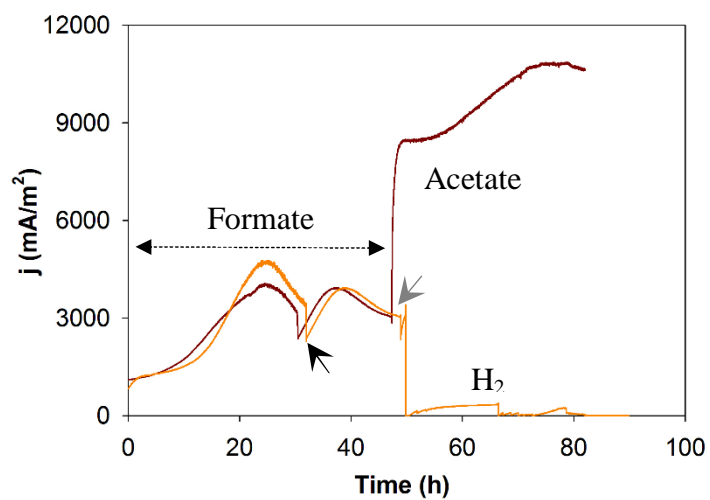

Source: https://biorxiv.org/content/10.1101/2020.03.04.974261v1.full.pdf
